# Supplementary material for: Structural brain alterations and their association with cognitive function and symptoms in Attention-deficit/Hyperactivity Disorder families
Source: PubMed Central journal article supplement — Neuroimage Clin. 2020 Apr 23;27:102273. doi: 10.1016/j.nicl.2020.102273 (PMC7210582; doi:10.1016/j.nicl.2020.102273), 2020-04-23
Supplement: mmc1.pdf [file mmc1.pdf]

Component 01

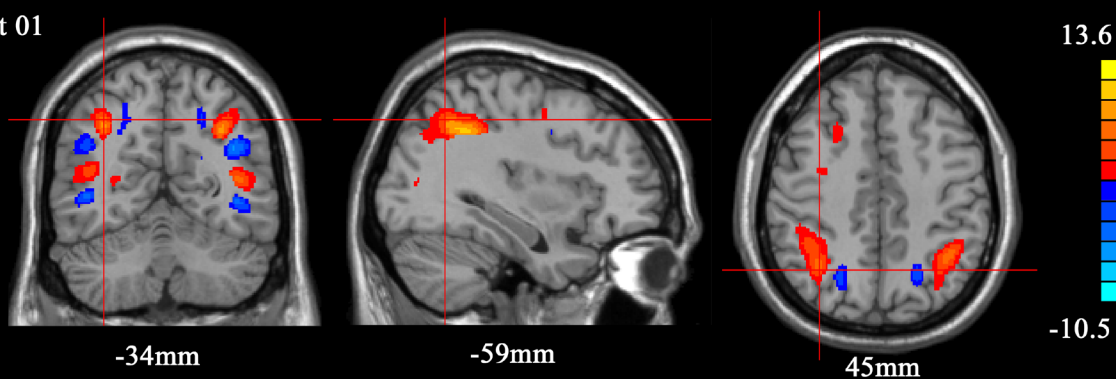

Component 02

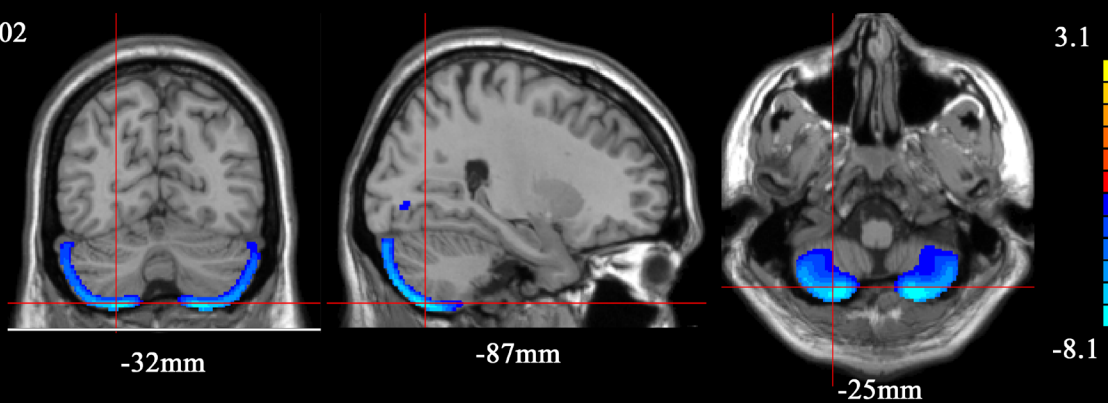

Component 03

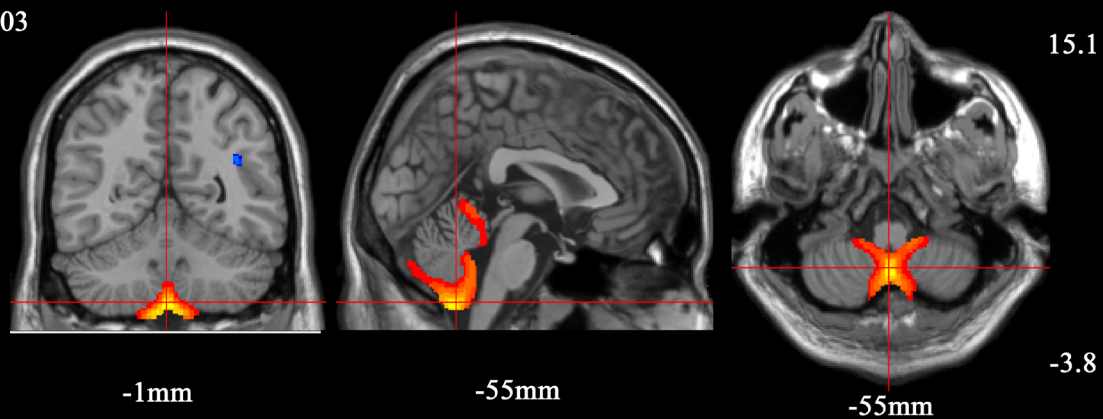

Component 04

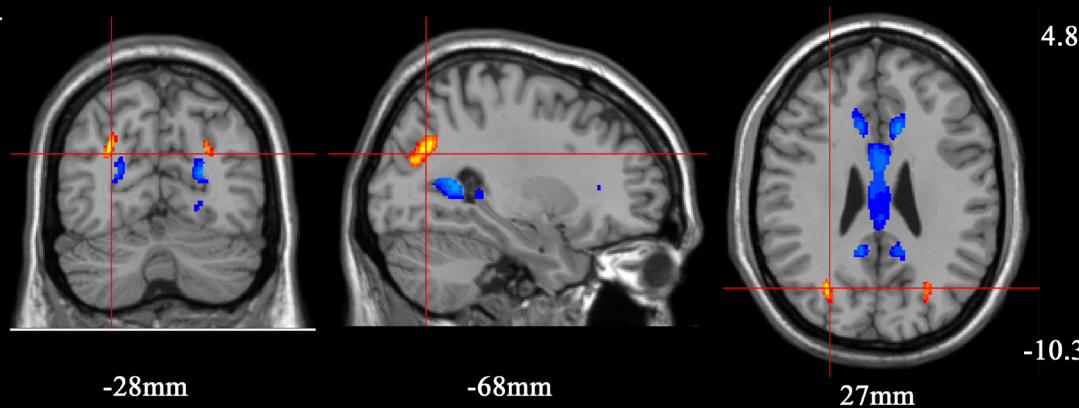

Component 05

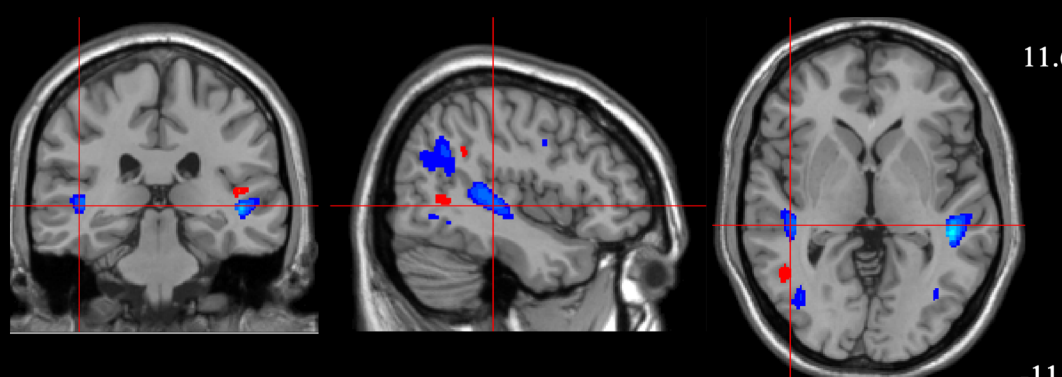

Component 06

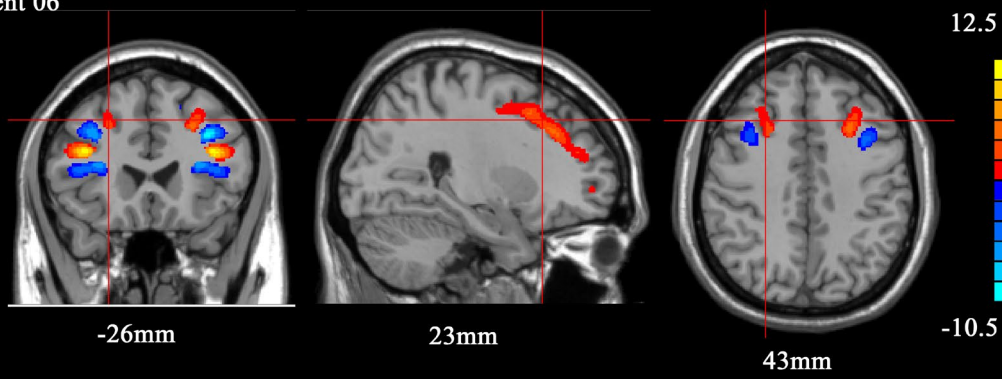

Component 07

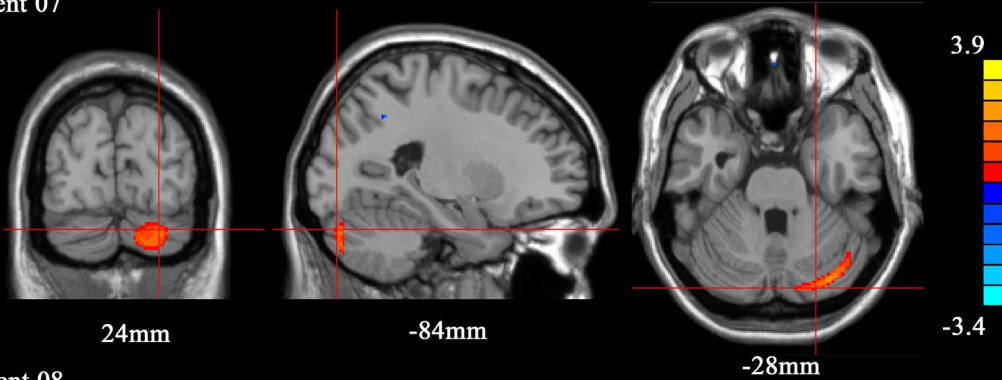

Component 08

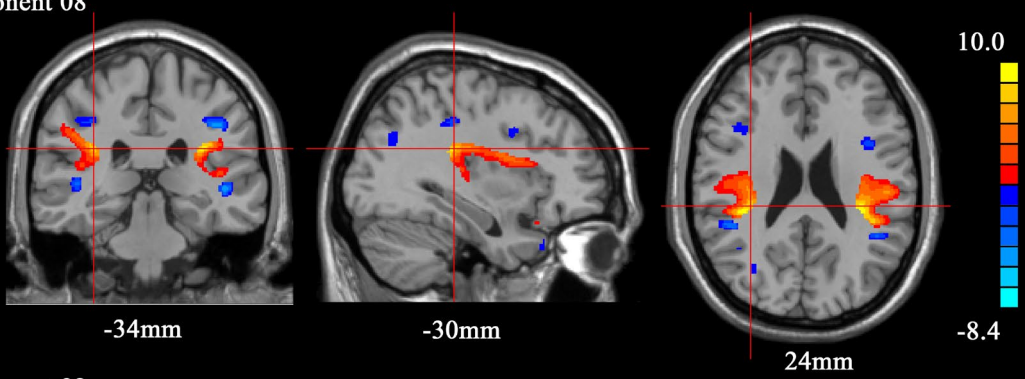

Component 09

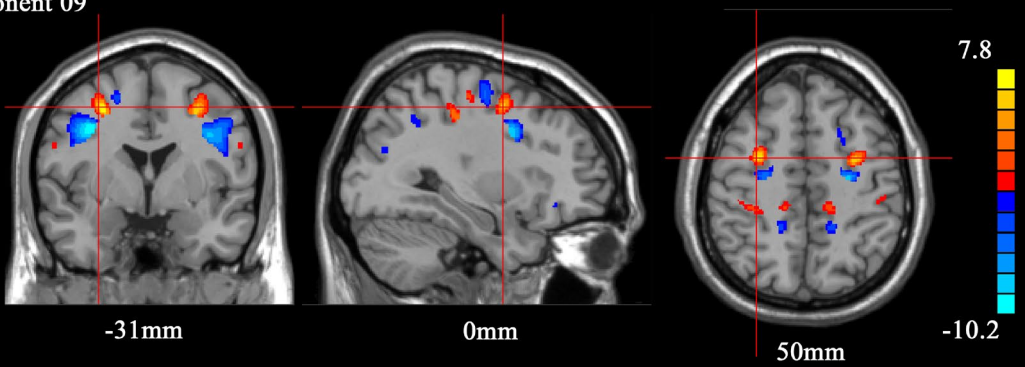

Component 10

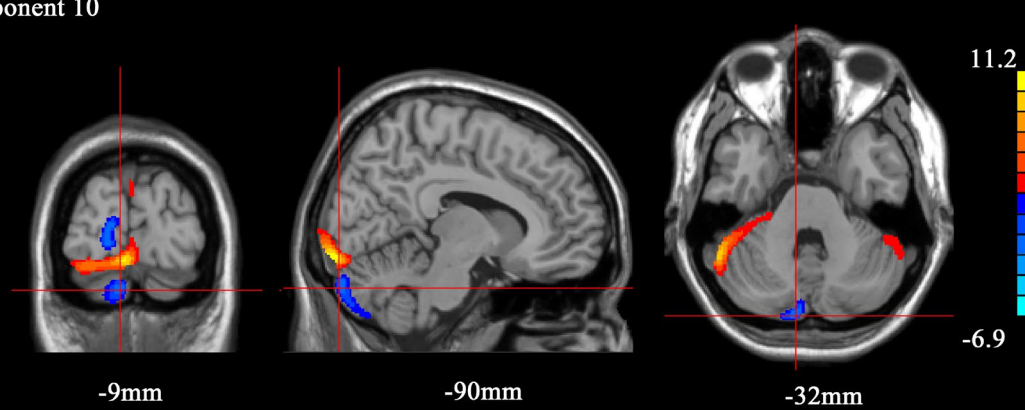

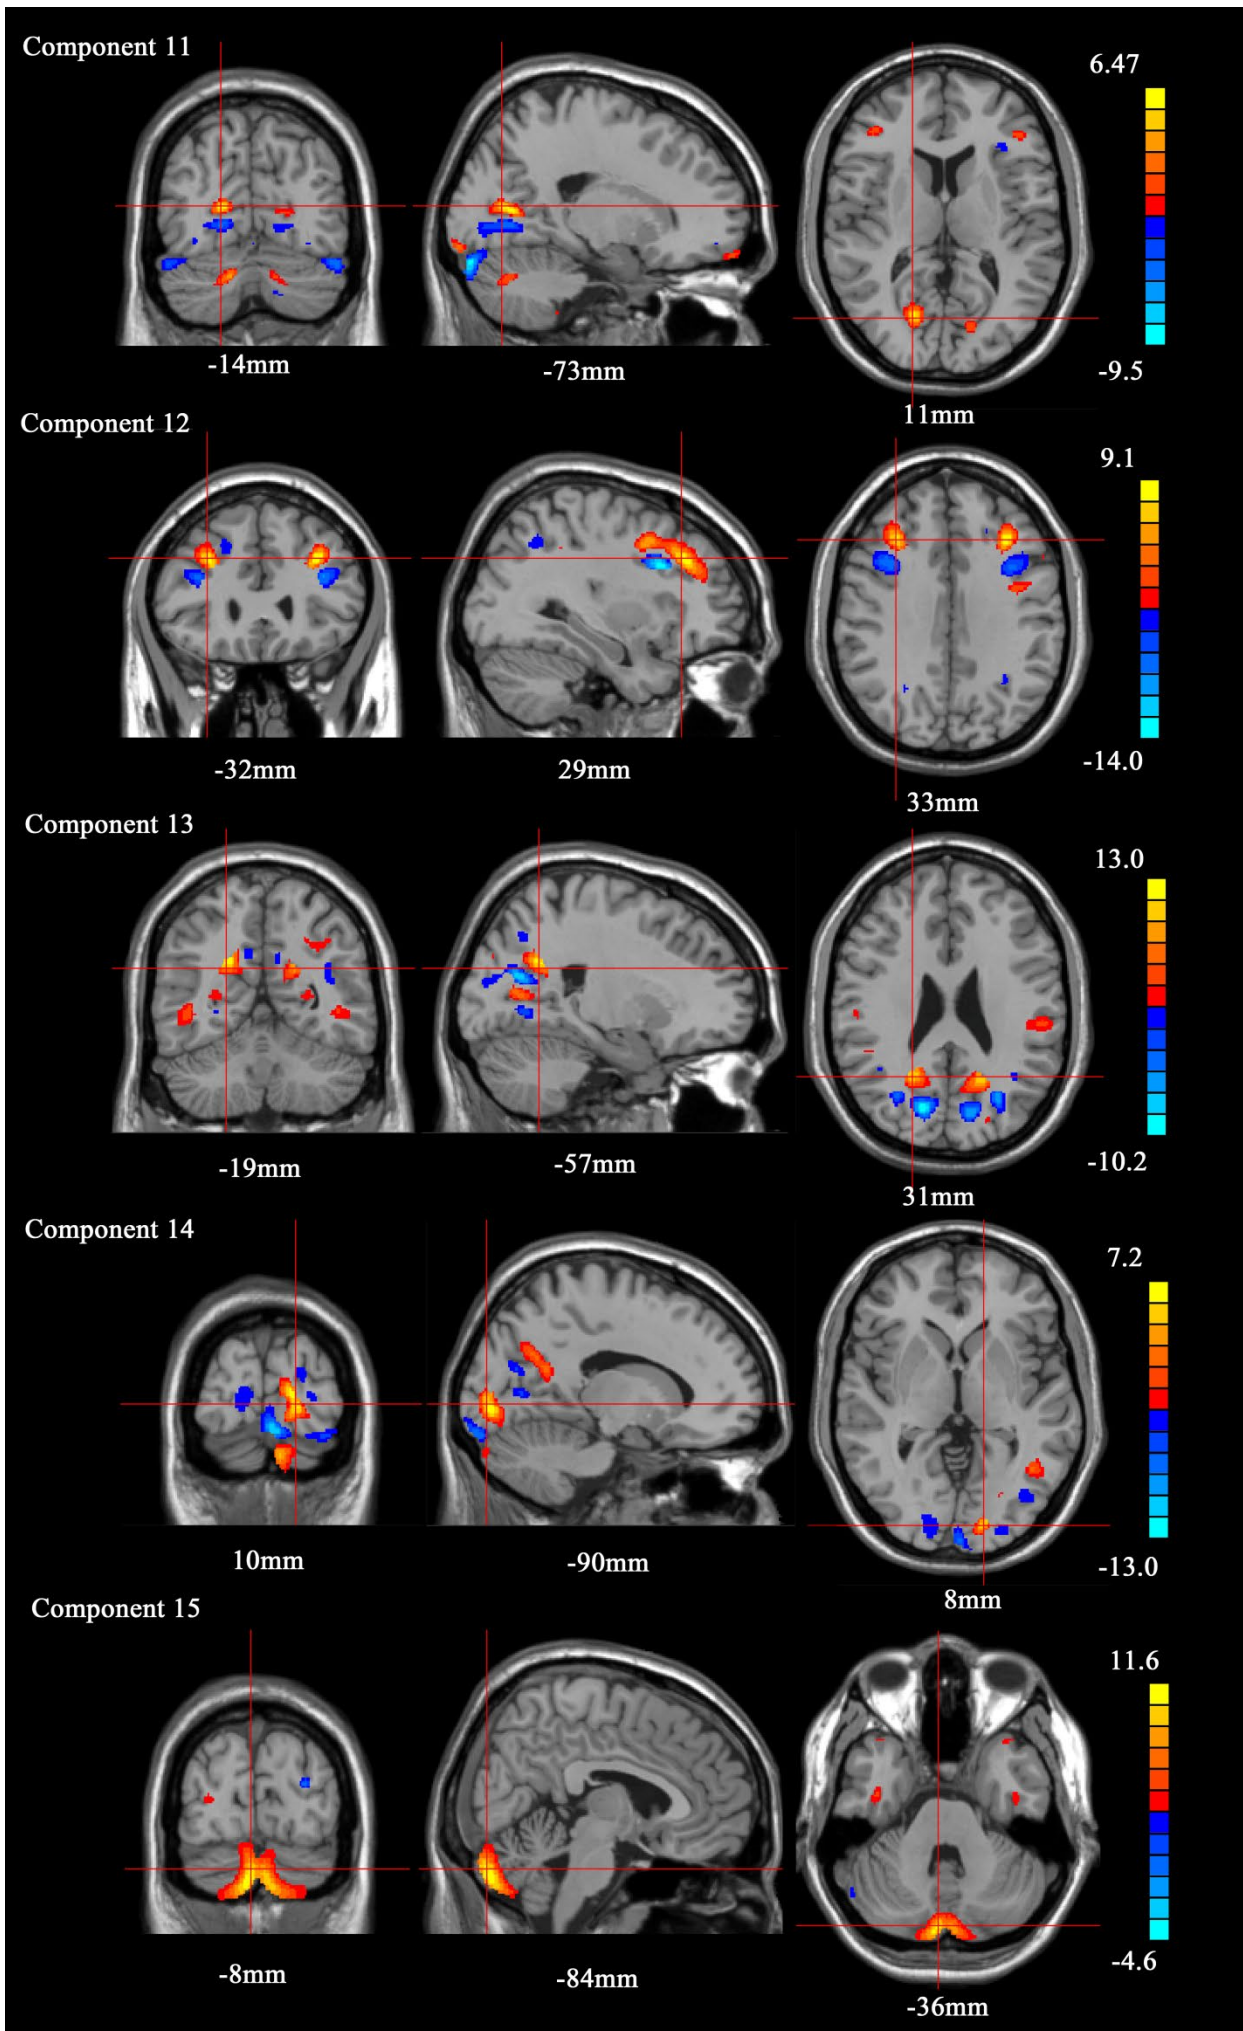

Component 16

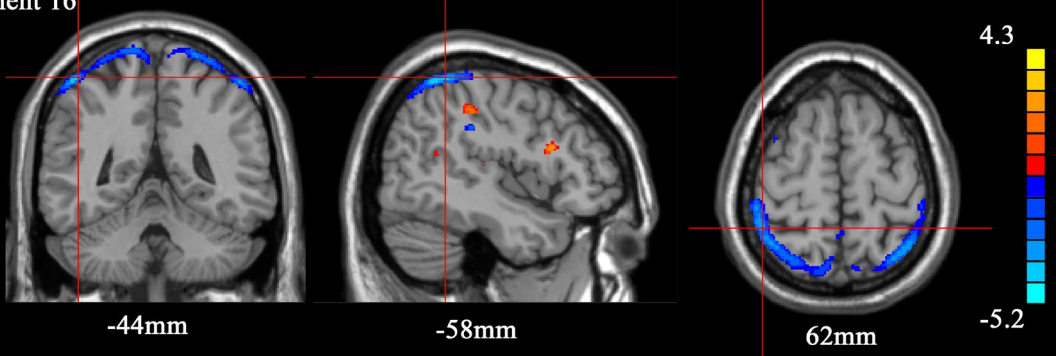

Component 17

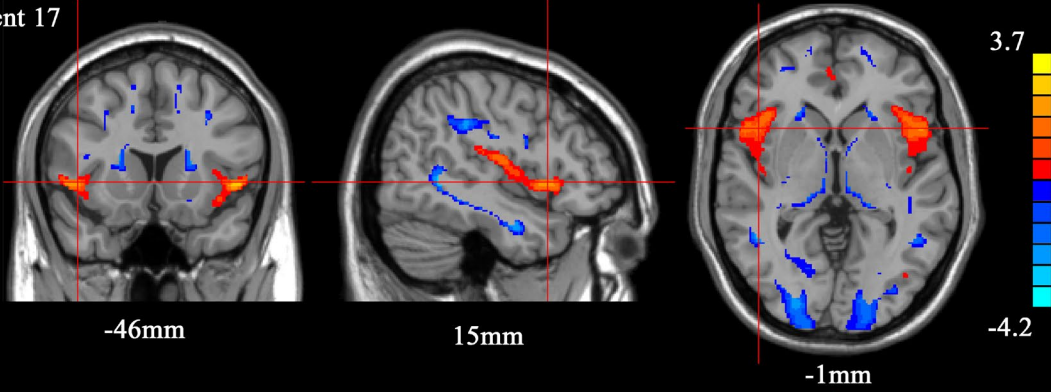

Component 18

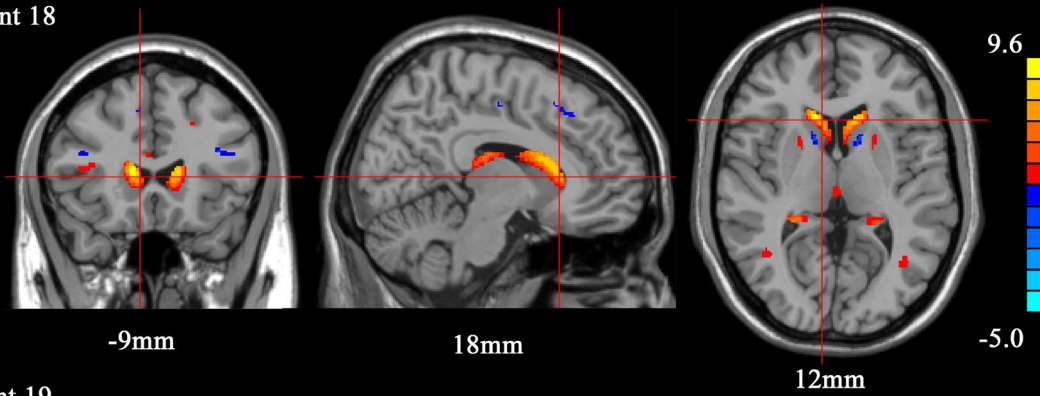

Component 19

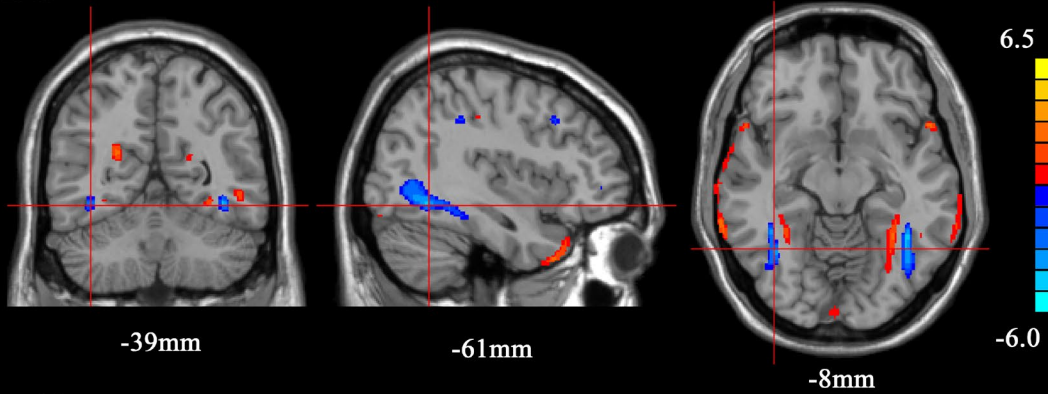

Component 20

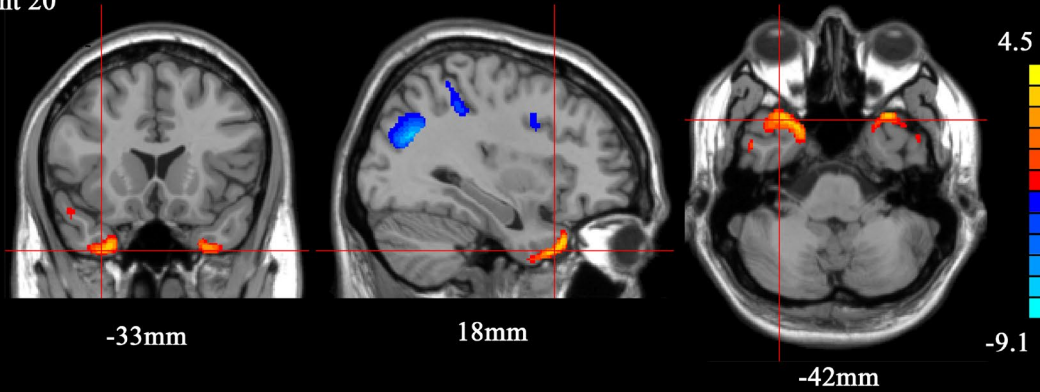

Supplemental figure 1. The T1 images were decomposed into 20 stable components (all set to Z score  $> 2$ ), and in the main text component A was component 10 while component B was component 17.
